# Supplementary material
Source: HighWire-hosted journal article supplement (https://bmjopenquality.bmj.com/content/11/2/e001789)

# **Teledermatology to reduce face-to-face appointments in general practice during the COVID-19 pandemic: a quality improvement project**

Keira Jones, Emer Lennon, Keighley McCathie, Angela Millar, Chris Isles, Angus McFadyen, Heather Shearer

## Supplementary Material - Quality Improvement Tools

# Contents

Slide 3 – Fishbone diagram of possible factors contributing to high face-to-face dermatological appointments during COVID-19

Slide 4 – Process map capturing the true system (red) of dermatological patient journey from booking phone call to end of consultation

Slide 5 – Stakeholder analysis grouping individuals interested in and/or likely to be affected by the project

Slide 6 – Drivers' diagram used as a roadmap connecting change theories with the project goal

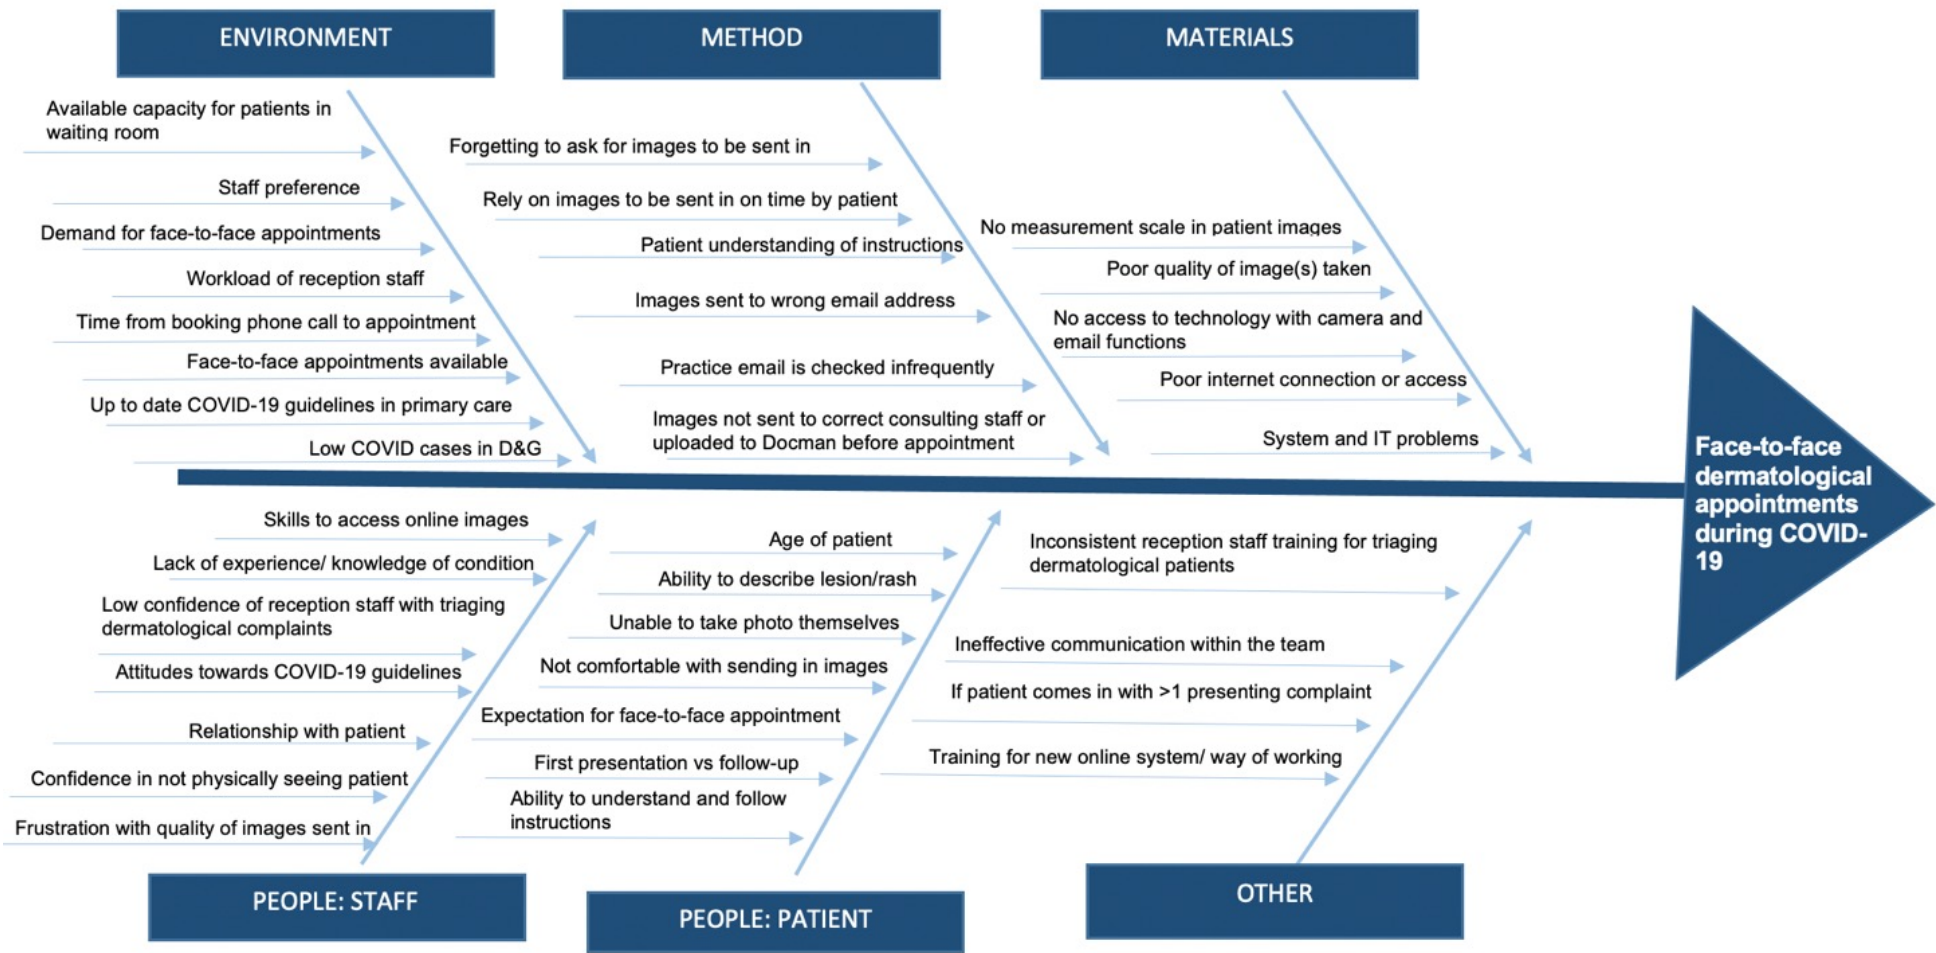

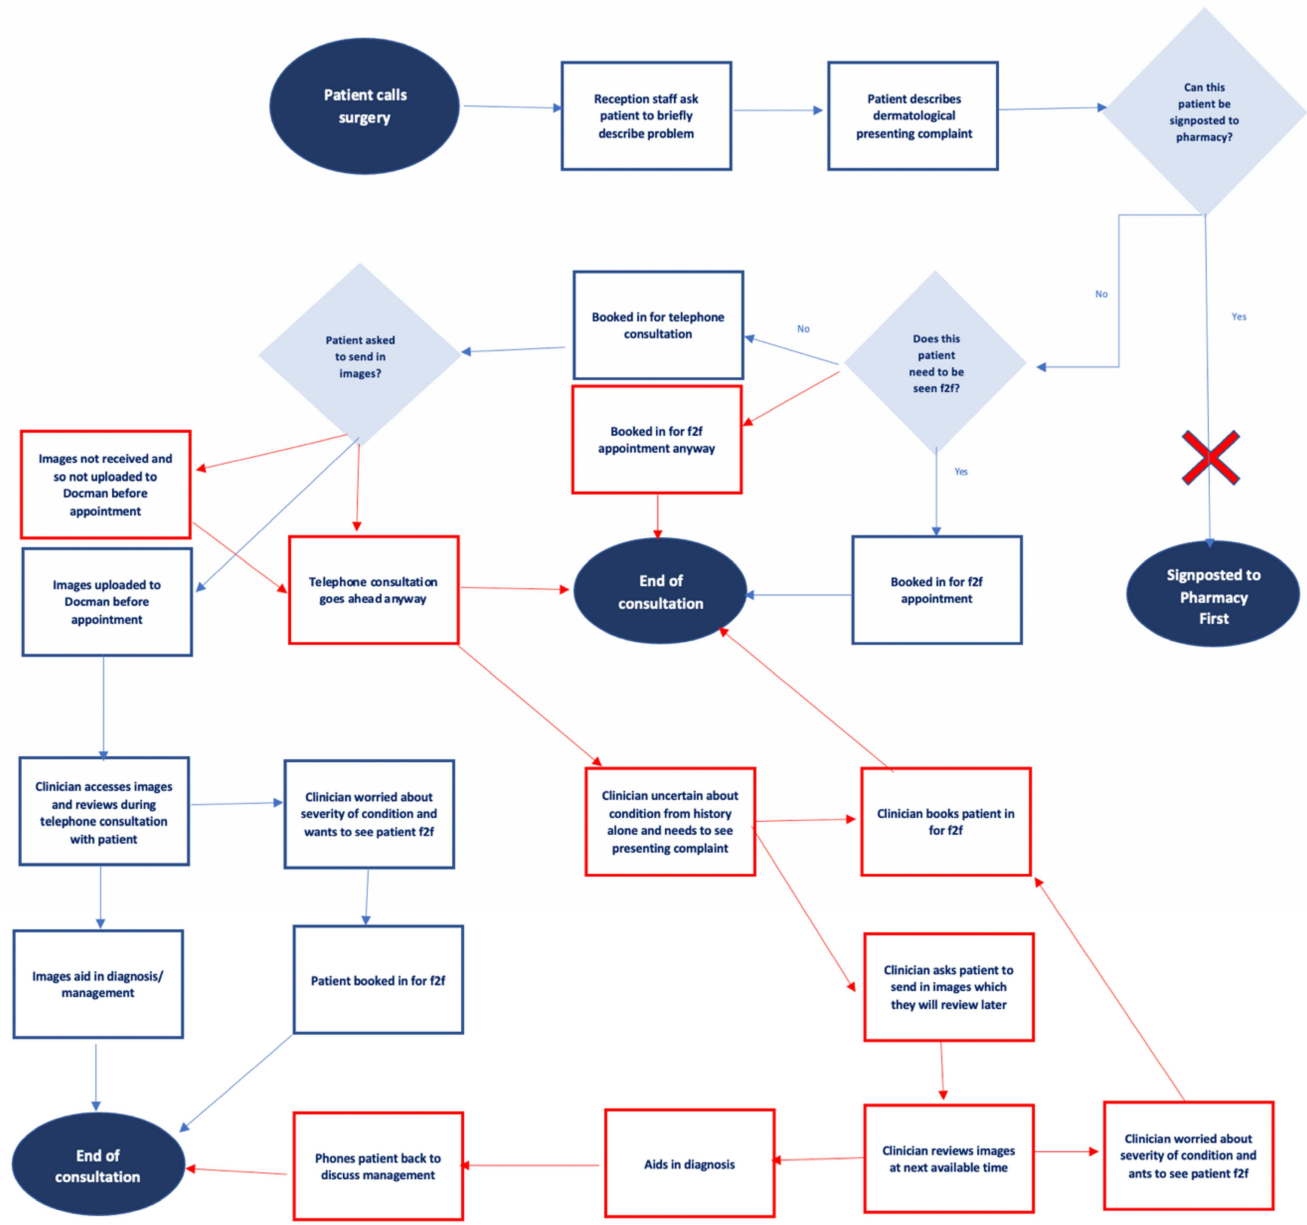

**KEY:**  
Oval = start or end point  
Rectangle = actions  
Diamond = decision point

Red arrows and rectangles = additional steps occurring in the present system and are likely contributing to the number of face-to-face dermatological appointments.  
Red cross = no evidence of the process occurring

(Abbreviation: f2f = face-to-face)

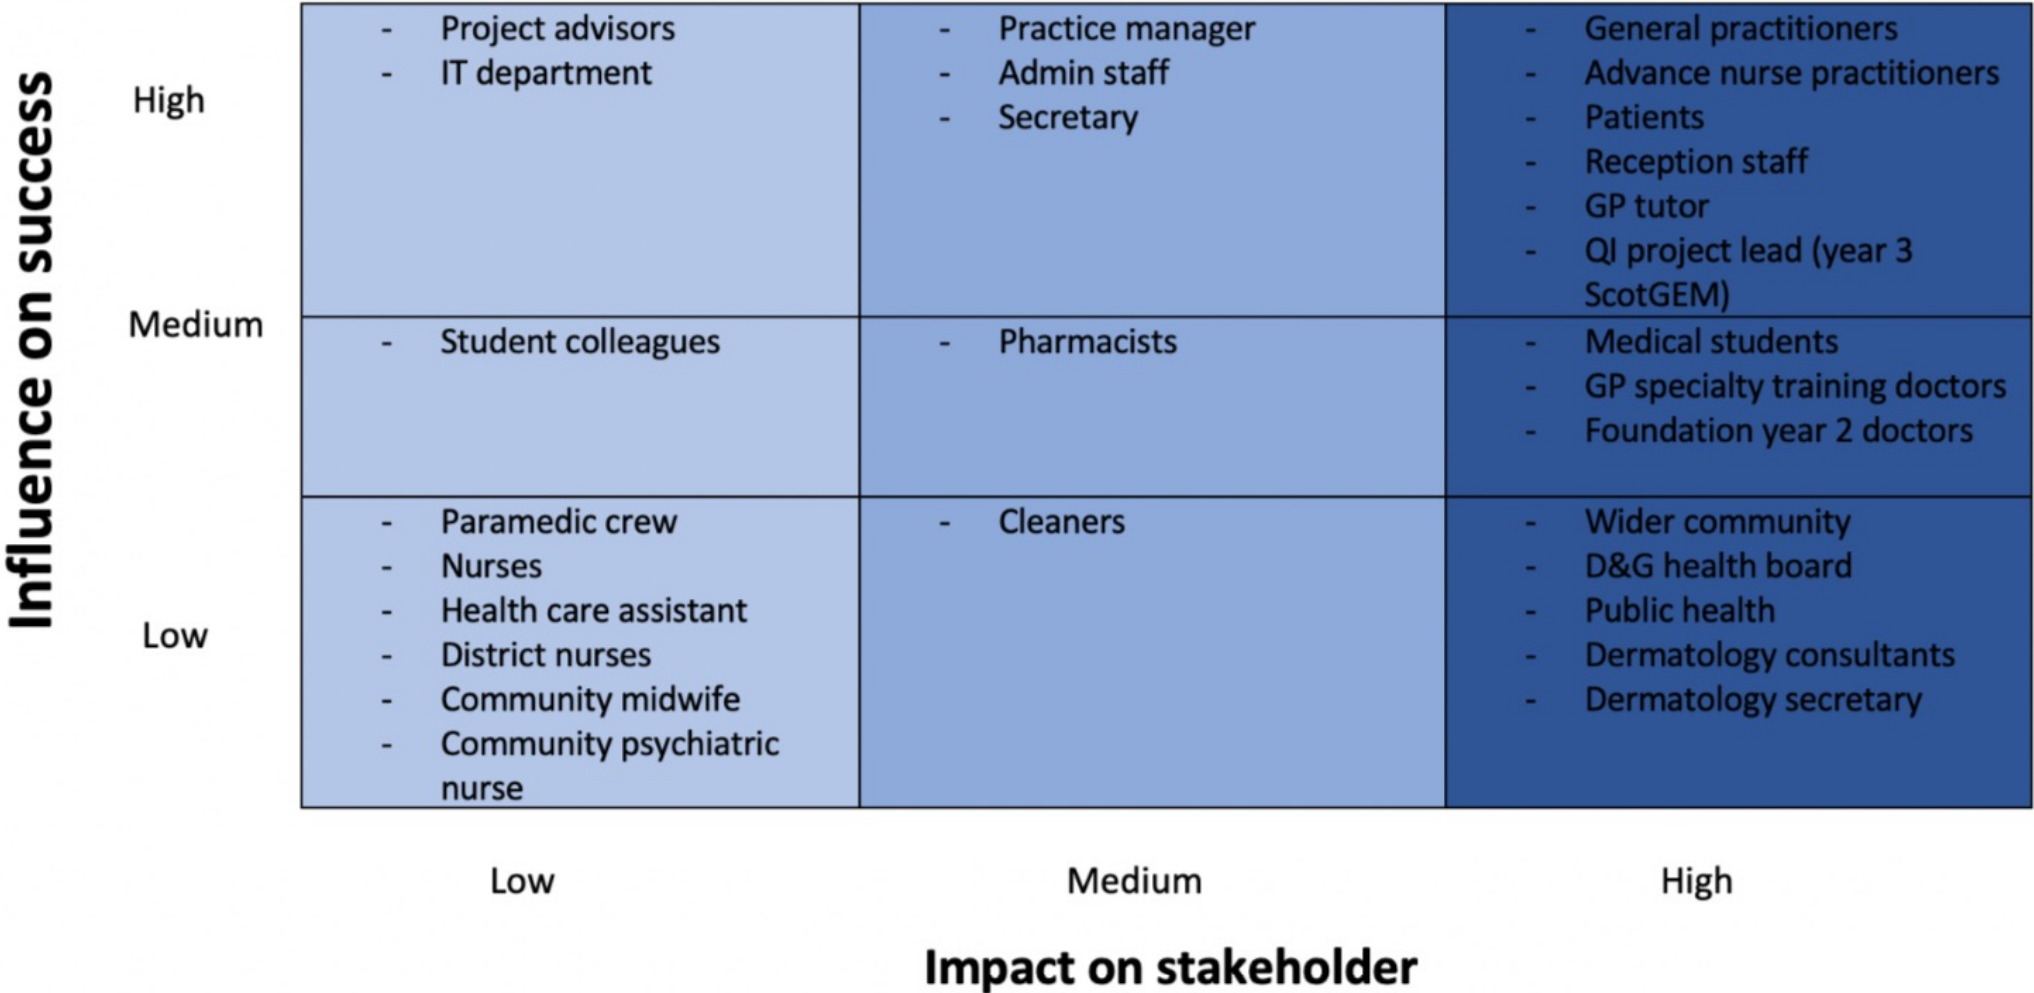



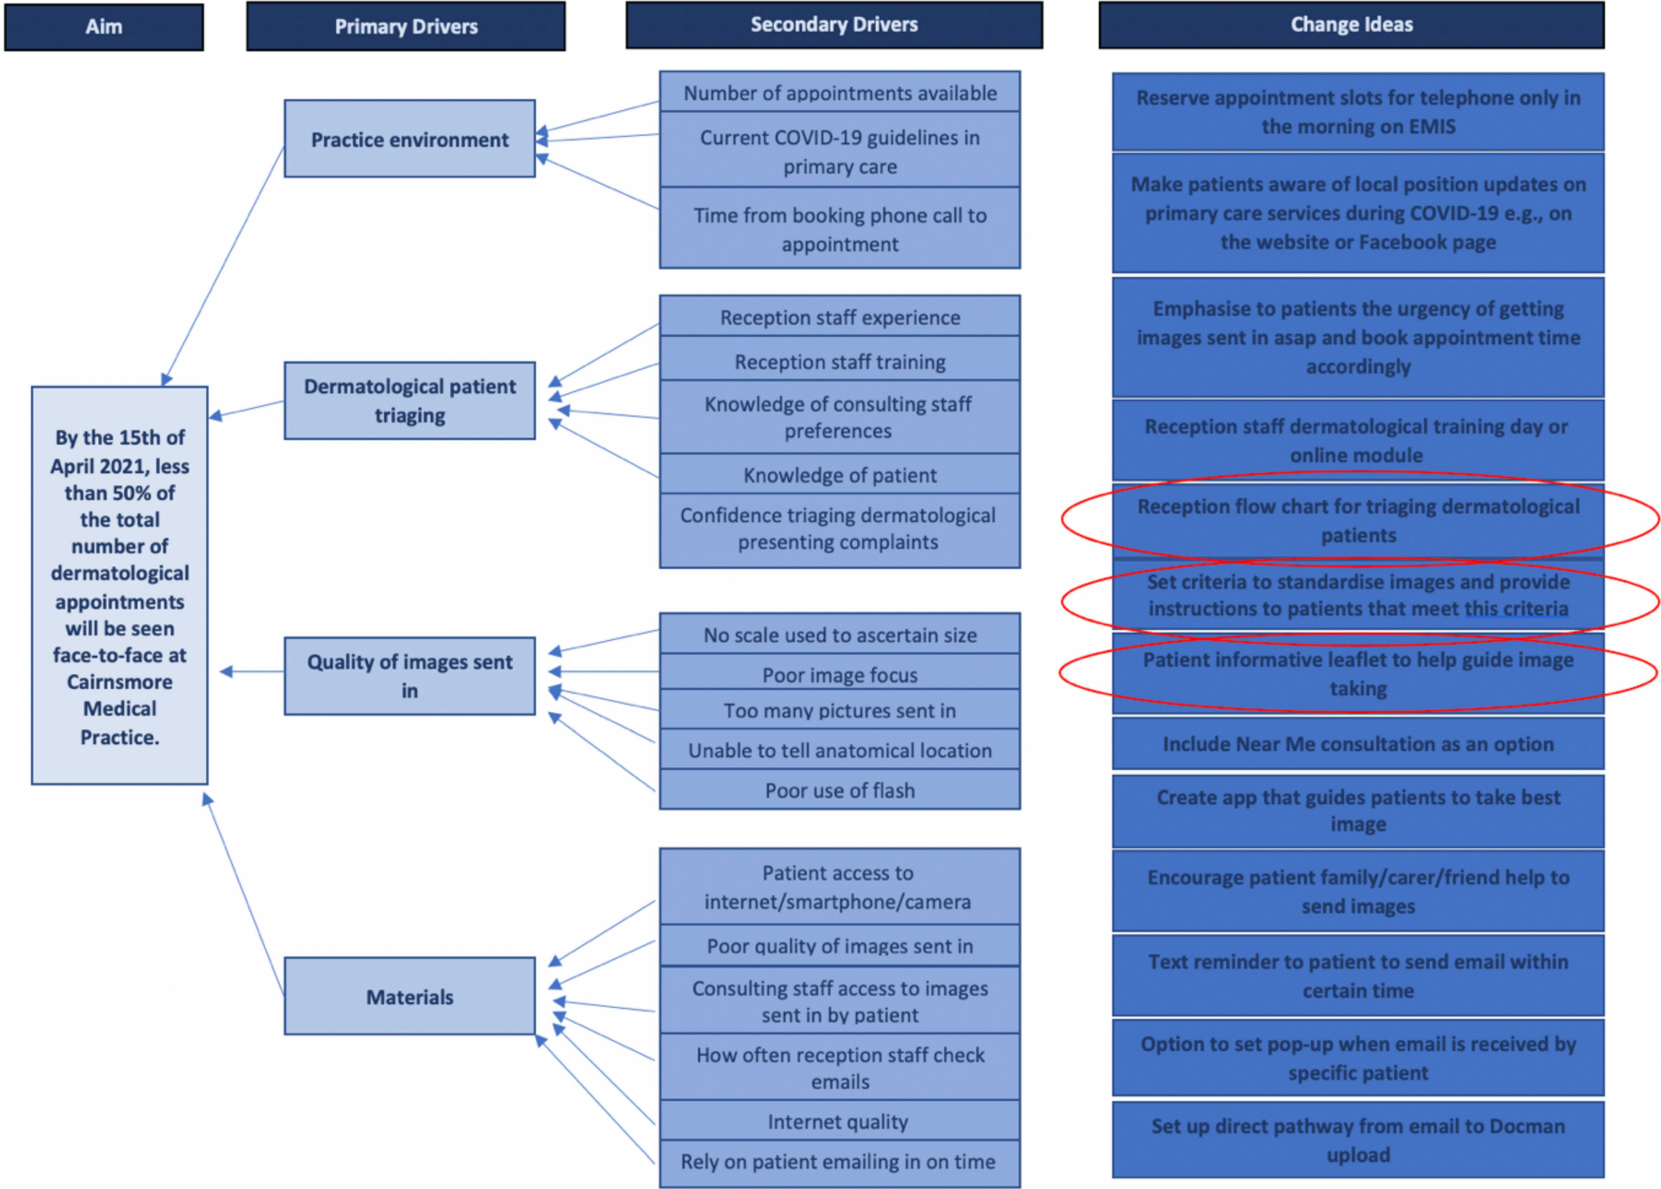

Supplement: inline-supplementary-material-1 [file inline-supplementary-material-1.pdf]
